# Supplementary material for: Tebuconazole and terbuthylazine encapsulated in nanocarriers: preparation, characterization and release kinetics
Source: Royal Society of Chemistry journal article supplement (doi:10.1039/d1en00981h), 2022-01-01
Supplement: d1en00981h1.pdf [file d1en00981h1.pdf]

Supplementary information for

**Tebuconazole and terbuthylazine encapsulated in nanocarriers:  
preparation, characterization and release kinetics.**

Rocío López-Cabeza<sup>a</sup>, Melanie Kah<sup>b</sup>, Renato Grillo<sup>c</sup>, Marek Koutný<sup>d</sup>, Jan Salač<sup>d</sup>, Zuzana Bílková<sup>a</sup>,  
Mahleh Eghbalinejad, Jakub Hofman<sup>a\*</sup>

<sup>a</sup>Research Centre for Toxic Compounds in the Environment (RECETOX), Faculty of Science,  
Masaryk University, Kamenice 753/5, Brno, 625 00, Czech Republic.

<sup>b</sup> School of Environment, University of Auckland, 23 Symonds Street, Auckland, 1010, New  
Zealand.

<sup>c</sup> Department of Physics and Chemistry, School of Engineering, São Paulo State University  
(UNESP), Ilha Solteira, SP, 15385-000, Brazil.

<sup>d</sup> Department of Environmental Protection Engineering, Faculty of Technology, Tomas Bata  
University, Vavrečkova 275, Zlín, 760 01, Czech Republic.

\* corresponding author: [jakub.hofman@recetox.muni.cz](mailto:jakub.hofman@recetox.muni.cz)

**Fig. 1S.**

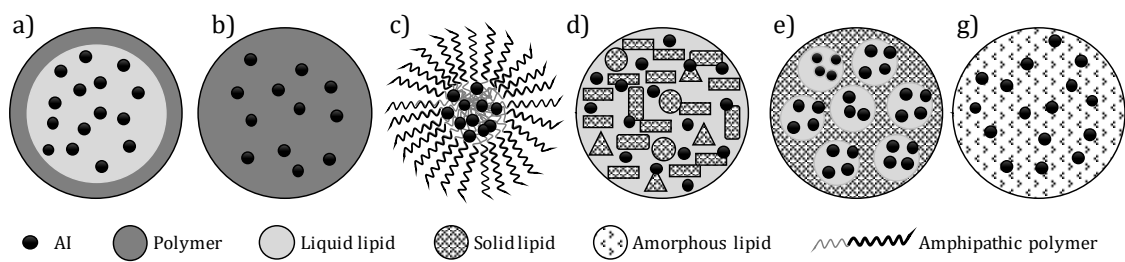

**Fig. 1.** Schematic presentation of different nanoparticle structures: a) nanocapsule, b) nanosphere, c) nanomicelle, d) imperfectly structured solid matrix, e) solid matrix containing nano-compartment of oil, and f) structureless solid amorphous matrix (modified from<sup>1,2</sup>).

**Table S1.** Main physicochemical properties and chemical structure of tebuconazole (TBZ) and terbuthylazine (TBA) from Pesticides Properties Data Base<sup>3</sup>

|     | $M_w^a$<br>(g mol <sup>-1</sup> ) | $S_w^b$<br>(mg l <sup>-1</sup> ) | Log $K_{ow}^c$ | $P_v^d$<br>(mPa) | $H^e$<br>(Pa m <sup>3</sup> mol <sup>-1</sup> ) | Chemical structure                                                                  |
|-----|-----------------------------------|----------------------------------|----------------|------------------|-------------------------------------------------|-------------------------------------------------------------------------------------|
| TBZ | 307.8                             | 36.0                             | 3.7            | 0.0013           | $1 \times 10^{-5}$                              | 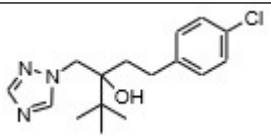 |
| TBA | 229.7                             | 6.6                              | 3.4            | 0.152            | $2.3 \times 10^{-3}$                            |  |

<sup>a</sup>  $M_w$  : molecular mass

<sup>b</sup>  $S_w$  : solubility in water at 20 °C

<sup>c</sup>  $K_{ow}$ : octanol-water partition coefficient at pH 7, 20 °C

<sup>d</sup>  $P_v$ : vapor pressure at 20 °C

<sup>e</sup> H: Henry's law constant at 25 °C

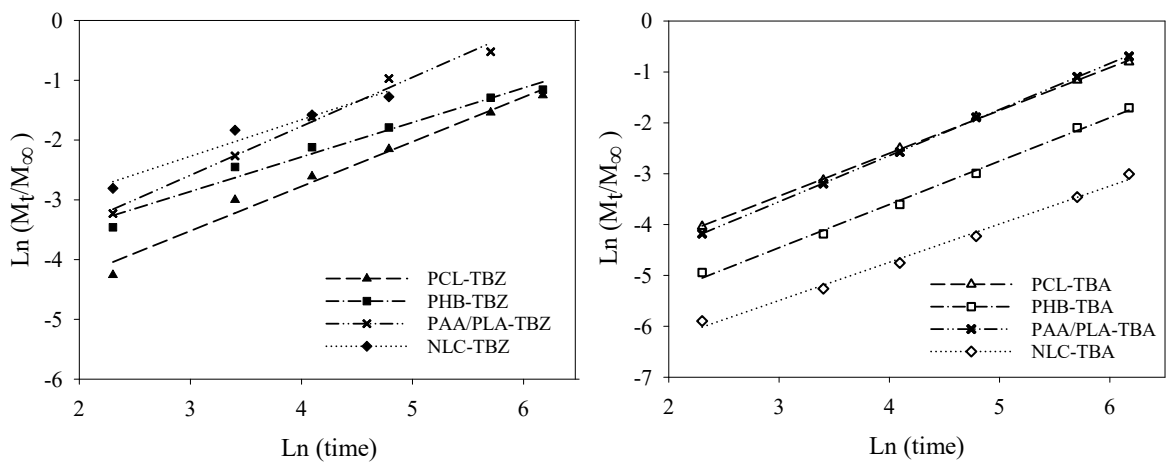

**Fig. S2.** Plot of the logarithm of tebuconazole (TBZ) and terbuthylazine (TBA) released from poly- $\epsilon$ -caprolactone (PCL), poly(3-hydroxybutyrate (PHB) and poly(acrylic acid)/polylactide (PAA/PLA) and nanostructured lipid nanocarrier (NLC) as a function of the logarithm of time, according to Korsmeyer-Peppas model.

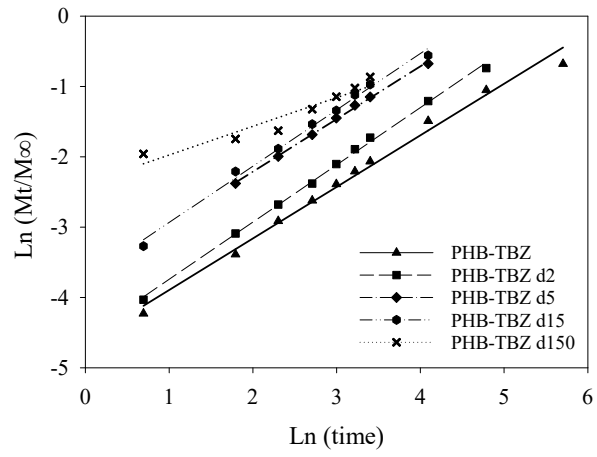

**Fig. S3.** Plot of the logarithm of tebuconazole (TBZ) released from poly(3-hydroxybutyrate (PHB) undiluted and diluted 2, 5, 10 and 100 times as a function of the logarithm of time, according to Korsmeyer-Peppas model.

*LC-MS/MS analysis.*

HPLC analysis was performed using an Agilent 1200 chromatographic system (Agilent, Santa Clara, CA, USA) equipped with a vacuum degasser, binary pump, autosampler and a column thermostat, which was connected online to an ESI/QqQ mass spectrometer Agilent Triple Quad 6410 (Agilent, Santa Clara, CA, USA). The chromatographic/mass spectrometric system was controlled by Mass Hunter software. The HPLC conditions were as follows: ACE 3 C18 chromatographic column 150 mm in length x 2.2 mm internal diameter and 3  $\mu\text{m}$  particle size, with integrated guard column 20 mm in length x 2.2 mm internal diameter and 3  $\mu\text{m}$  particle size (ACE, Scotland, UK). The column temperature was maintained at 30 °C. The mobile phase consisted of 0.1% acid formic (98% Sigma-Aldrich, Germany) in water and acetonitrile. The mobile phase gradient was as follows: 0–1 min 10% B, 1–7 min from 10% B to 98% B, and 98% B held to 12 min, 12–13 min from 98% B to 10% B with a subsequent equilibration step of 10% B to 25 min. The flow of mobile phase was 0.3 ml/min during all the analyses.

The injection volume was 5  $\mu\text{l}$  of the samples and 5  $\mu\text{l}$  of the instrumental standard solution (d-metolachlor in acetonitrile, 50 ng ml<sup>-1</sup>; Dr. Ehrenstorfer).

The mass spectrometer was operated in the ESI-positive SRM mode (gas temperature 350 °C, gas flow 9 l min<sup>-1</sup>, nebuliser gas 40 psi, capillary voltage 4.0 kV). The following ion transitions were monitored: tebuconazole,  $m/z$  308.2→70.0 with a collision energy of 20 eV (and for confirmation,  $m/z$  308.2→151.0, 20 eV); terbuthylazine,  $m/z$ , 230.0→174.0, 20 eV ( $m/z$  230.0 →104.0, 20 eV); D-metolachlor,  $m/z$  290.1→258.1, 10 eV ( $m/z$  290.1→182.1, 10 eV).

Quantitation of analytes was performed using an internal standard calibration method. Internal standards (d-metolachlor) were added to all samples for these purposes. Good linearity of calibration curves was obtained across the whole concentration range (from 1 to 1000 ng ml<sup>-1</sup>).

## References

- 1 J. H. Lee and Y. Yeo, *Chem. Eng. Sci.*, 2015, **125**, 75–84.
- 2 F. Tamjidi, M. Shahedi, J. Varshosaz and A. Nasirpour, *Innov. Food Sci. Emerg. Technol.*, 2013, **19**, 29–43.
- 3 K. A. Lewis, J. Tzilivakis, D. J. Warner and A. Green, *Hum. Ecol. Risk Assess.*, 2016, **22**, 1050–1064.
